# Supplementary material
Source: publisher figshare collection journal article supplement (https://diabetesjournals.figshare.com/articles/dataset/_/22593070)
Supplement: Supplementary file 1 [file 40112098]

## Supplemental Results

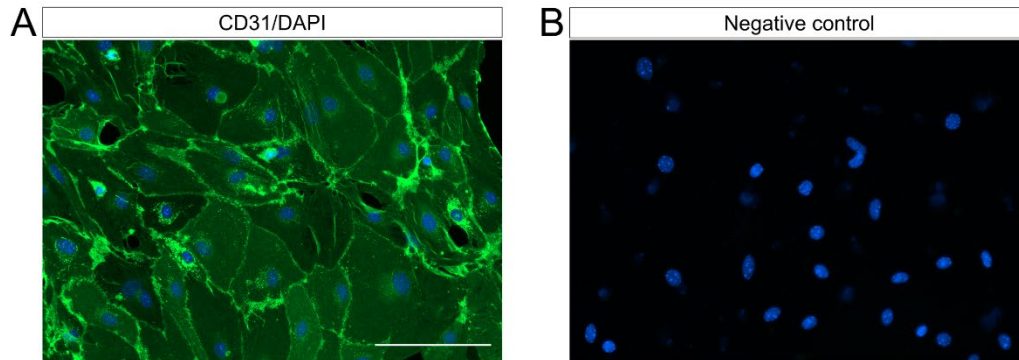

Suppl. Figure 1

### Supplemental Figure 1. Verification of primary mouse capillary vascular endothelial cells.

Mouse brain capillary vascular cells were isolated and seeded in collagen I-coated plates. Cells were blocked with 5% BSA with Triton X 100 following the fixation with 4% PFA. An anti-CD31 antibody (R&D) was used for the immunostaining. **A.** Representative image of CD31 staining merged with DAPI. **B.** Negative control. Scale bar: 100  $\mu\text{m}$ .

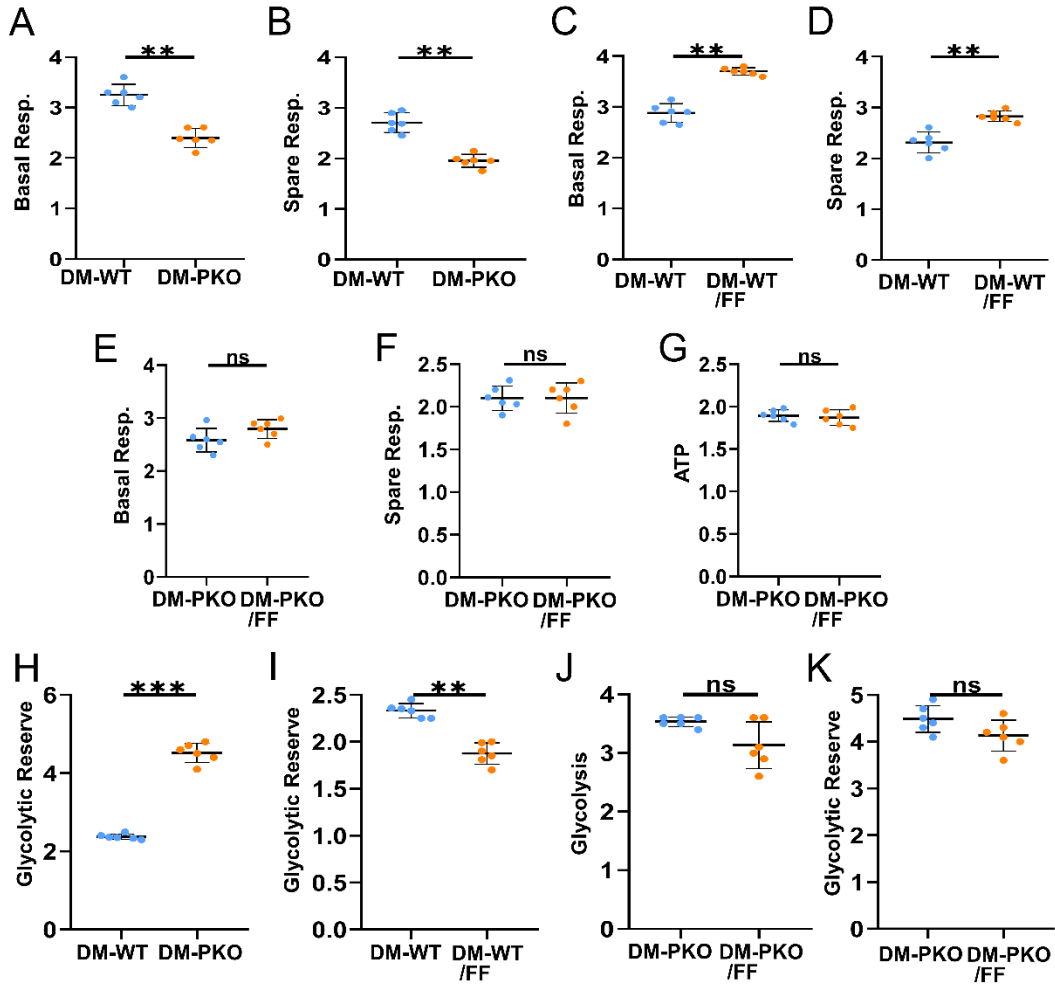

Suppl. Figure 2

**Supplemental Figure 2. Decreased mitochondrial function and increased glycolysis in diabetic *PPARα*<sup>-/-</sup> monocytes.** Monocytes isolated from diabetic wild-type (DM-WT) and diabetic *PPARα*<sup>-/-</sup> (DM-PKO) mice with or without fenofibrate chow (FF) were used for mitochondrial and glycolytic assays using a Seahorse XFe96 Analyzer. Monocytes from diabetic *PPARα*<sup>-/-</sup> mice showed a decreased basal (**A**) and spare respiration (**B**, pmol/min/1000 cells) and an increased glycolysis reserve (**H**, mpH/min/1000 cells) than monocytes from diabetic WT mice. Fenofibrate chow effectively preserved the mitochondrial function in both basal (**C**) and spare respiration capacity (**D**) and inhibited the glycolysis reserve (**I**) in diabetic WT monocytes, but not in diabetic *PPARα*<sup>-/-</sup> monocytes (**E-G, J, K**), suggesting that the protective effect of fenofibrate on monocytic metabolism is *PPARα*-dependent. All values are mean±SD, n=6; \*\*P<0.01; \*\*\*P<0.001. n.s., no significant difference. Resp.=Respiration rate

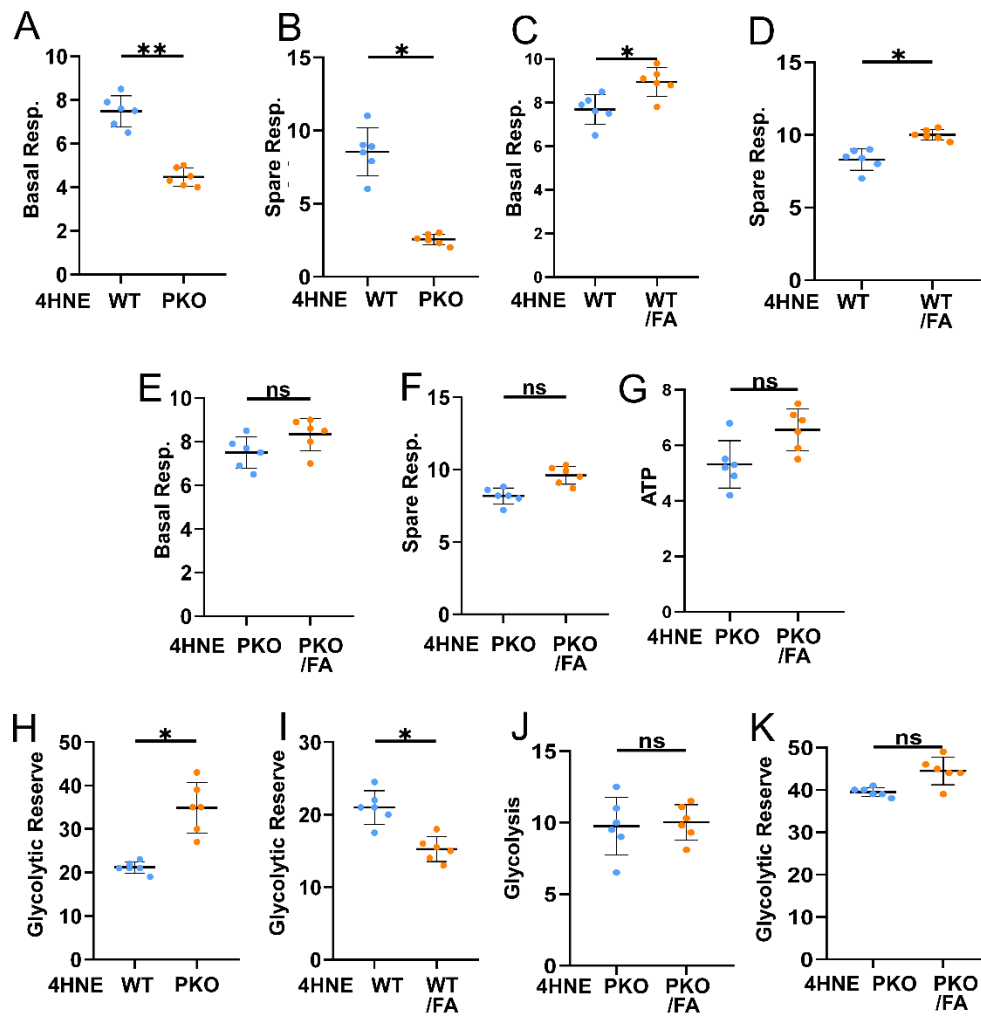

Suppl. Figure 3

**Supplemental Figure 3. PPAR $\alpha$  prevented the metabolic profile changes induced by 4HNE**

**in monocytes.** Monocytes were isolated from *PPAR $\alpha$ <sup>-/-</sup>* mice (PKO) and wild-type (WT) littermates. The cells were exposed to 4HNE with and without fenofibric acid (FA) for 6 hr and then used for assays of mitochondrial oxidation and glycolysis. Relative to WT monocytes, 4HNE induced a more prominent decrease in basal and spare respiration (**A, B**) and increased glycolysis reserve (**H**) in *PPAR $\alpha$ <sup>-/-</sup>* monocytes. FA protected basal and spare (**C, D**) respiration and decreased glycolysis reserve (**I**) in 4HNE-treated WT monocytes, but not in the 4HNE-treated *PPAR $\alpha$ <sup>-/-</sup>* monocytes (**E-G, J, K**). These metabolic profiles indicated that PPAR $\alpha$  prevented the decline of mitochondrial function and the increase of glycolysis under diabetic conditions. All values are mean $\pm$ SD, n=6; \*P<0.05; \*\*P<0.01. n.s., no significant difference.

Resp.=Respiration rate

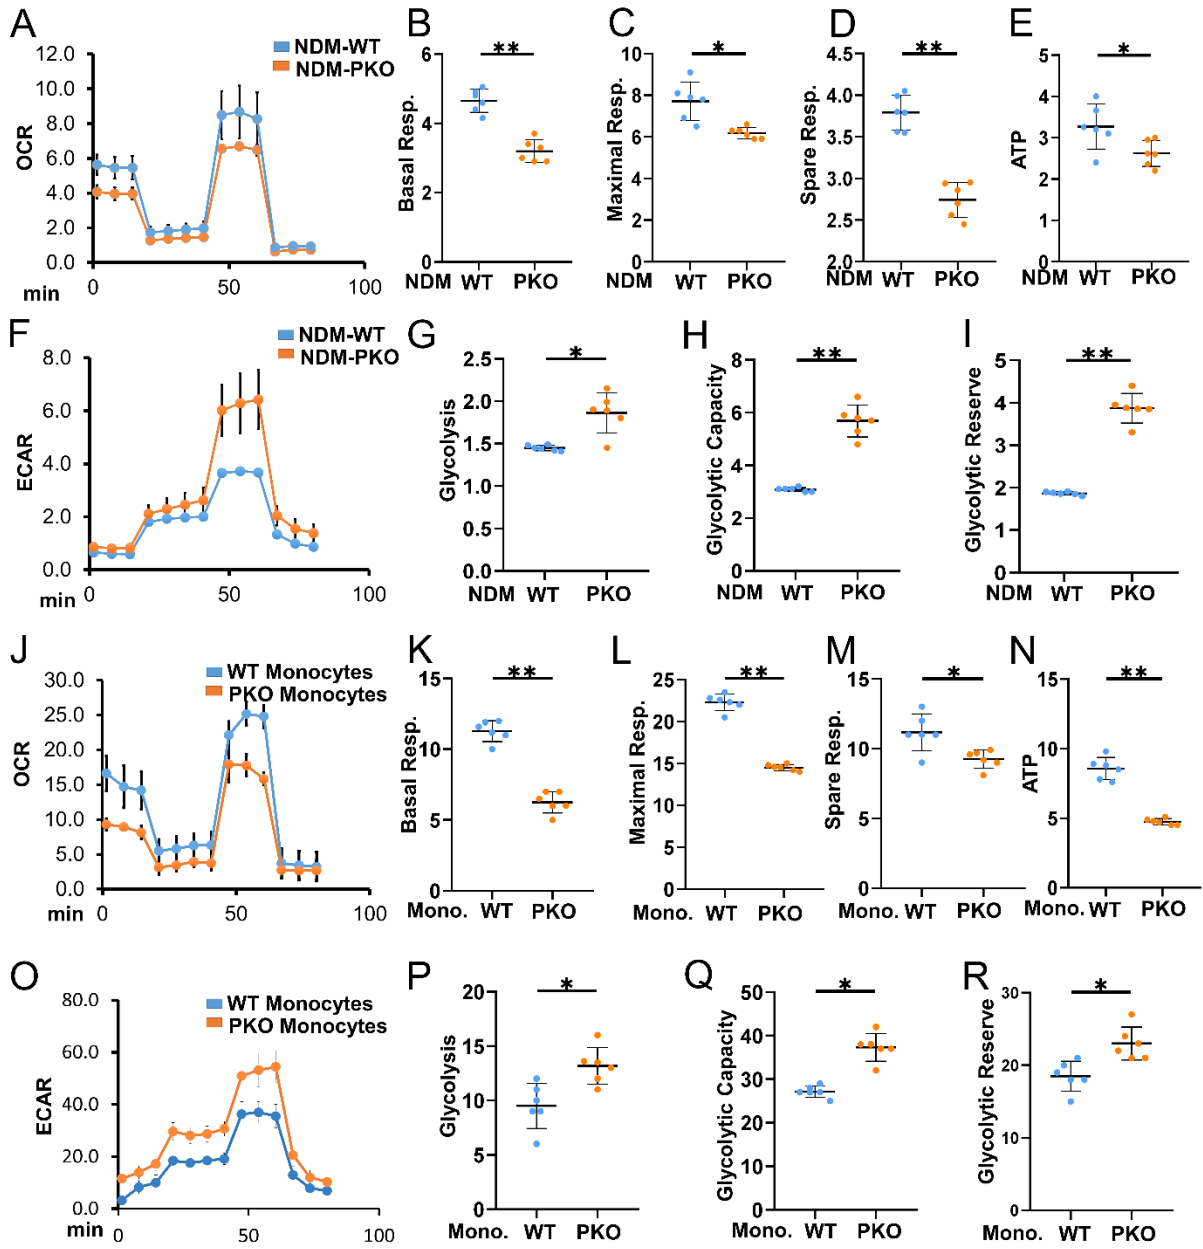

Suppl. Figure 4

**Supplemental Figure 4. Decreased mitochondrial function and increased glycolysis in non-diabetic *PPARα*<sup>-/-</sup> monocytes.** Monocytes were isolated from age-matched non-diabetic (NDM) *PPARα*<sup>-/-</sup> (PKO) mice and wild-type (WT) mice (**A-I**). *PPARα* knockout alone caused declined mitochondrial function (**A-E**) as shown by a decreased real-time OCR value (pmol/min/1000 cells, **A**), basal, maximal, spare respiration capacity, and ATP generation (**B-E**), while elevated ECAR value (mpH/min/1000 cells, **F**), glycolysis, glycolytic and glycolytic reserve (**G-I**). Monocytes were isolated from *PPARα*<sup>-/-</sup> mice (PKO) and wild-type (WT) littermates (**J-R**). *PPARα*<sup>-/-</sup> monocytes showed a lower OCR (**J**), basal, maximal, and spare respiration capacity, and ATP generation (**K-N**), while a higher ECAR (**O**), glycolysis, glycolytic capacity, glycolytic reserve (**P-R**) relative to WT monocytes. These results suggest that *PPARα* regulates the mitochondrial and glycolytic profiles in monocytes. All values are mean±SD, n=6; \*P<0.05; \*\*P<0.01.

**Supplemental Table 1. Body Weight and blood Glucose of STZ-induced mice fed with Fenofibrate chow**

|                                     | <b>NDM</b>   | <b>NDM+FF</b>              | <b>DM</b>                   | <b>DM+FF</b>                |
|-------------------------------------|--------------|----------------------------|-----------------------------|-----------------------------|
| <b><i>Body Weight (g)</i></b>       |              |                            |                             |                             |
| <b><i>Duration of Diabetes</i></b>  |              |                            |                             |                             |
| 0 week                              | 24.63±0.44   | 24.65±0.62                 | 26.33±0.94                  | 27.053±0.5                  |
| 1 month                             | 27.17±0.85   | 27.00±1.00 <sup>n.s</sup>  | 26.10±1.30 <sup>****</sup>  | 26.80±0.66 <sup>****</sup>  |
| 2 months                            | 28.83±0.90   | 28.95±0.59 <sup>n.s</sup>  | 24.17±0.69 <sup>****</sup>  | 25.00±0.58 <sup>****</sup>  |
| 3 months                            | 30.20±1.15   | 29.67±0.88 <sup>n.s</sup>  | 23.30±0.56 <sup>****</sup>  | 23.53±0.63 <sup>****</sup>  |
| <b><i>Blood Glucose (mg/dl)</i></b> |              |                            |                             |                             |
| <b><i>Duration of Diabetes</i></b>  |              |                            |                             |                             |
| 0 week                              | 161.83±6.36  | 171.67±5.44 <sup>n.s</sup> | 164.83±12.75                | 163.00±10.54                |
| 1 month                             | 157.33±11.51 | 166.33±6.99 <sup>n.s</sup> | 355.87±4.00 <sup>****</sup> | 357.00±5.20 <sup>****</sup> |
| 2 months                            | 165.33±13.07 | 163.67±8.79 <sup>n.s</sup> | 365.00±4.97 <sup>****</sup> | 361.17±5.34 <sup>****</sup> |
| 3 months                            | 163.67±12.49 | 164.00±6.98 <sup>n.s</sup> | 375.93±5.14 <sup>****</sup> | 374.17±5.15 <sup>****</sup> |

Values are means ± SD. \*\*\*\*P< 0.0001 versus NDM group, n.s., no significant difference. n=6.  
 NDM: non diabetic mouse; DM: STZ-induced diabetic mice; FF: fenofibrate chow.



**Supplemental Table 2. Body Weight and blood Glucose of STZ-induced Wild-type mice and *PPARα*<sup>-/-</sup> mice fed with Fenofibrate chow**

|                                     | WT-DM        | WT-DM+FF                     | PKO-DM                       | PKO-DM+FF                    |
|-------------------------------------|--------------|------------------------------|------------------------------|------------------------------|
| <b><i>Body Weight (g)</i></b>       |              |                              |                              |                              |
| <b><i>Duration of Diabetes</i></b>  |              |                              |                              |                              |
| 0 week                              | 27.17±1.07   | 26.83±0.69                   | 26.67±0.75                   | 27.00±1.00                   |
| 1 month                             | 26.62±0.61   | 26.53±0.69 <sup>n.s.</sup>   | 26.50±0.96 <sup>n.s.</sup>   | 26.75±0.85 <sup>n.s.</sup>   |
| 2 months                            | 24.68±0.51   | 24.45±0.43 <sup>n.s.</sup>   | 24.03±0.48 <sup>n.s.</sup>   | 24.43±0.32 <sup>n.s.</sup>   |
| 3 months                            | 23.28±0.49   | 23.53±0.35 <sup>n.s.</sup>   | 23.42±0.63 <sup>n.s.</sup>   | 23.93±0.86 <sup>n.s.</sup>   |
| <b><i>Blood Glucose (mg/dl)</i></b> |              |                              |                              |                              |
| <b><i>Duration of Diabetes</i></b>  |              |                              |                              |                              |
| 0 week                              | 166.17±7.20  | 168.50±6.95                  | 165.50±6.45                  | 166.50±6.24                  |
| 1 month                             | 355.83±3.62  | 360.50±10.47 <sup>n.s.</sup> | 361.50±7.91 <sup>n.s.</sup>  | 355.67±5.59 <sup>n.s.</sup>  |
| 2 months                            | 463.33±6.16  | 461.50±8.88 <sup>n.s.</sup>  | 465.17±8.55 <sup>n.s.</sup>  | 449.17±28.63 <sup>n.s.</sup> |
| 3 months                            | 456.00±13.58 | 454.33±7.87 <sup>n.s.</sup>  | 437.83±34.60 <sup>n.s.</sup> | 433.83±37.93 <sup>n.s.</sup> |

Values are means ± SD, n=6, WT: Wild-type mice, PKO: *PPARα*<sup>-/-</sup> mice. DM: STZ-induced diabetic mice; FF: fenofibrate chow. n.s., no significant difference vs WT-DM group

**Supplemental Table 3. Body Weight and blood Glucose of STZ-induced diabetic mice**

|                              | WT-DM        | <i>PPAR</i> $\alpha$ <sup>MCKO</sup> -DM | <i>PPAR</i> $\alpha$ <sup>MCTg</sup> -DM |
|------------------------------|--------------|------------------------------------------|------------------------------------------|
| <b>Body Weight (g)</b>       |              |                                          |                                          |
| <b>Duration of Diabetes</b>  |              |                                          |                                          |
| 0 week                       | 25.97±0.78   | 25.75±0.89                               | 25.33±0.94                               |
| 1 month                      | 25.75±0.85   | 25.25±0.63 <sup>n.s</sup>                | 24.82±1.10 <sup>n.s</sup>                |
| 2 months                     | 23.35±0.34   | 23.08±0.20 <sup>n.s</sup>                | 23.23±0.65 <sup>n.s</sup>                |
| 3 months                     | 22.57±0.50   | 22.22±0.85 <sup>n.s</sup>                | 21.78±0.65 <sup>n.s</sup>                |
| <b>Blood Glucose (mg/dl)</b> |              |                                          |                                          |
| <b>Duration of Diabetes</b>  |              |                                          |                                          |
| 0 week                       | 161.50±6.63  | 162.67±8.65                              | 161.00±7.94                              |
| 1 month                      | 356.75±4.54  | 360.08±8.06 <sup>n.s</sup>               | 361.33±10.08 <sup>n.s</sup>              |
| 2 months                     | 449.33±23.15 | 448.00±18.18 <sup>n.s</sup>              | 453.00±15.83 <sup>n.s</sup>              |
| 3 months                     | 442.17±31.44 | 453.33±23.86 <sup>n.s</sup>              | 435.50±42.84 <sup>n.s</sup>              |

Values are means ± SD, n=6, WT: Wild-type mice. DM: STZ-induced diabetic mice. n.s., no significant difference, vs WT-DM group

**Supplemental Table 4. Decreased mitochondrial function and increased glycolysis in diabetic *PPARα*<sup>-/-</sup> monocytes.**

|                                                                        | GROUP 1   |            | GROUP 2    |              | GROUP 3   |              | GROUP 4   |                          |
|------------------------------------------------------------------------|-----------|------------|------------|--------------|-----------|--------------|-----------|--------------------------|
|                                                                        | NDM- WT   | NDM- PKO   | DM-WT      | DM-PKO       | DM-WT     | DM-WT+FF     | DM-PKO    | DM-PKO+FF                |
| <b><i>Mito Stress Assay (OCR value, pmol/min/1000 cells)</i></b>       |           |            |            |              |           |              |           |                          |
| Basal Resp.                                                            | 4.65±0.33 | 3.20±0.32  | 3.23±0.49  | 2.25±0.30**  | 2.88±0.19 | 3.70±0.07**  | 2.58±0.22 | 2.80±0.18 <sup>n.s</sup> |
| Maxi. Resp.                                                            | 7.72±0.92 | 6.18±0.27  | 6.05±0.100 | 4.13±0.32**  | 5.32±0.45 | 8.07±0.16*** | 4.32±0.07 | 4.54±0.09 <sup>n.s</sup> |
| Spare. Resp.                                                           | 3.79±0.21 | 2.74±0.21  | 2.71±0.19  | 1.95±0.13**  | 2.31±0.20 | 2.83±0.10**  | 2.1±0.14  | 2.1±0.18 <sup>n.s</sup>  |
| ATP                                                                    | 3.27±0.54 | 2.62±0.32  | 2.75±0.23  | 1.76±0.17**  | 2.03±0.20 | 3.69±0.03*** | 1.89±0.07 | 1.87±0.09 <sup>n.s</sup> |
| <b><i>Glycolysis Stress Assay (ECAR value, mpH/min/1000 cells)</i></b> |           |            |            |              |           |              |           |                          |
| Glycolysis                                                             | 1.45±0.03 | 1.86±0.23* | 2.12±0.10  | 3.52±0.07*** | 2.19±0.12 | 0.91±0.10*** | 3.53±0.08 | 3.28±0.32 <sup>n.s</sup> |
| Glyco. Cap.                                                            | 3.08±0.08 | 5.86±0.60  | 4.57±0.24  | 7.82±0.15*** | 4.50±0.18 | 2.85±0.12**  | 7.95±0.15 | 7.48±0.50 <sup>n.s</sup> |
| Glyco. Res.                                                            | 1.86±0.04 | 3.87±0.35  | 2.37±0.07  | 4.52±0.25*** | 2.33±0.08 | 1.88±0.11**  | 4.48±0.29 | 4.13±0.33 <sup>n.s</sup> |

Values are means ± SD. \*P< 0.05, \*\*P< 0.01, \*\*\*P< 0.001 vs NDM-WT in GROUP 1, vs DM-WT in GROUP 2, vs DM-WT in GROUP 3, or vs DM-PKO in GROUP 4. n.s., no significant difference. n=6. Basal Resp.: Basal Respiration Rate, Maxi. Resp.: Maximal Respiration Rate, Spare Resp.: Spare mitochondrial Respiration capacity, Glyco. Cap.: Glycolytic Capacity, Glyco. Res.: Glycolytic Reserve, WT: Wild-type; PKO: *PPARα*<sup>-/-</sup>, FF: Fenofibrate chow.

**Supplemental Table 5. Decreased mitochondrial function and increased glycolysis in *PPARα*<sup>-/-</sup> monocytes with 4HNE treatment.**

|                                                                        | GROUP 1    |              | GROUP 2    |             | GROUP 3    |             | GROUP 4    |                           |
|------------------------------------------------------------------------|------------|--------------|------------|-------------|------------|-------------|------------|---------------------------|
|                                                                        | WT         | PKO          | 4HNE-WT    | 4HNE-PKO    | 4HNE-WT    | 4HNE-WT+FA  | 4HNE-PKO   | 4HNE-PKO+FA               |
| <b><i>Mito Stress Assay (OCR value, pmol/min/1000 cells)</i></b>       |            |              |            |             |            |             |            |                           |
| Basal Resp.                                                            | 12.02±0.99 | 6.25±0.69**  | 7.48±0.71  | 4.47±0.41** | 7.68±0.68  | 8.95±0.67*  | 7.50±0.72  | 8.33±0.74                 |
| Maxi.                                                                  | 22.28±1.01 | 14.52±0.37** | 15.95±1.53 | 6.62±0.63** | 16.85±1.22 | 18.67±1.11* | 15.53±0.63 | 17.58±0.38 <sup>n.s</sup> |
| Spare.                                                                 | 11.17±1.21 | 9.22±0.68*   | 8.55±1.63  | 2.55±0.37*  | 8.30±0.73  | 10.00±0.36* | 8.17±0.56  | 9.05±1.13 <sup>n.s</sup>  |
| ATP                                                                    | 8.77±0.73  | 4.95±0.10**  | 5.67±0.64  | 3.03±0.20** | 5.60±0.63  | 7.18±0.63*  | 5.32±0.86  | 6.38±0.90 <sup>n.s</sup>  |
| <b><i>Glycolysis Stress Assay ECAR value, (mpH/min/1000 cells)</i></b> |            |              |            |             |            |             |            |                           |
| Glycolysis                                                             | 9.58±2.01  | 13.05±1.33*  | 9.75±1.57  | 11.42±1.48  | 11.67±1.25 | 10.00±1.29* | 9.75±2.02  | 10.02±1.24 <sup>n.s</sup> |
| Glyco.                                                                 | 28.33±0.94 | 35.70±4.23*  | 32.00±3.51 | 44.67±5.22  | 32.83±3.24 | 25.67±2.58* | 48.17±0.75 | 55.17±2.91 <sup>n.s</sup> |
| Glyco. Res.                                                            | 18.83±1.34 | 22.67±2.43*  | 21.17±1.33 | 34.83±5.81  | 21.00±2.30 | 15.25±1.72* | 39.5±1.05  | 41.83±4.07 <sup>n.s</sup> |

Values are means ± SD. \*P< 0.05, \*\*P< 0.01 versus WT in GROUP 1, vs 4HNE-WT in GROUP 2, vs 4HNE-WT in GROUP 3, or vs 4HNE-PKO in GROUP 4. n.s., no significant difference. n=6. Basal Resp.: Basal Respiration Rate, Maxi. Resp.: Maximal Respiration Rate, Spare Resp.: Spare mitochondrial Respiration capacity, Glyco. Cap.: Glycolytic Capacity, Glyco. Res.: Glycolytic Reserve, WT: Wild-type, PKO: *PPARα*<sup>-/-</sup>, FA: Fenofibric acid.
